# Supplementary material for: Molecular Structure-Based Screening of the Constituents of Calotropis procera Identifies Potential Inhibitors of Diabetes Mellitus Target Alpha Glucosidase
Source: MDPI journal article supplement (doi:10.3390/cimb44020064), 2022-02-21
Supplement: s1 [file s1]

## Supplementary Information

**Table S1:** Some selected known Inhibitors of alpha glucosidase obtained from literature used in screening against alpha glucosidase and their corresponding references.

| Compound                                        | IC <sub>50</sub>              | Unit   | Reference |
|-------------------------------------------------|-------------------------------|--------|-----------|
| Acacetin                                        | 0.16                          | mmol/L | [1]       |
| Kaempferol                                      | 1.16 ± 0.04 × 10 <sup>5</sup> | mol/L  | [2]       |
|                                                 | 153.39 ± 1.79                 | μM     | [3]       |
| Hesperetin 5-O-glucoside                        | 41.25 ± 1.25                  | μg/mL  | [4]       |
| Luteolin                                        | 82.73 ± 2.51                  | μM     | [3]       |
| Rutin                                           | 0.196                         | mM     | [5]       |
|                                                 | 173.58 ± 1.23                 | μM     | [3]       |
| Plicatanoside                                   | 111.23 ± 0.65                 | uM     | [6]       |
| Sulochrin                                       | 8.5                           | mg/mL  | [7]       |
| Vitexin                                         | 0.42                          | mmol/L | [1]       |
| Isoquercetrin                                   | 0.185                         | mM     | [5]       |
|                                                 | 0.24                          | mmol/L | [1]       |
| Rosmarinic acid                                 | 33.0 ± 4.6                    | μmol/L | [1]       |
| Swertisin                                       | 0.37                          | mmol/L | [1]       |
| Acteoside                                       | 1.62 ± 0.29                   | mmol/L | [1]       |
| Acarbose                                        | 2.09 ± 0.03 × 10 <sup>4</sup> | mol/L  | [1]       |
|                                                 | 0.59 ± 0.14                   | μM     | [1]       |
|                                                 | 996                           | nM     | [8]       |
| Fisetin                                         | 19,600                        | nM     | [8]       |
| Quercetin                                       | 0.017                         | mM     | [5]       |
|                                                 | 14.6 ± 3.72                   | μmol/L | [1]       |
| Myricetin                                       | 11.63 ± 0.36                  | μM     | [3]       |
|                                                 | 30,200                        | nM     | [8]       |
| 4-(p-toluenesulfonamide)-3,4-dihydroxy chalcone | 193,700                       | nM     | [8]       |
| 4-Amino-4-hydroxychalcone                       | 268,900                       | nM     | [8]       |
| Apigenen-7-O-rutinoside                         | 64.29 ± 2.41                  | μg/mL  | [9]       |
| Miglitol                                        | 465.1                         | μM     | [10]      |
| Naringenin                                      | 44.65                         | μg/mL  | [11]      |
| Tiliroside                                      | 14.5 ± 0.1                    | μmol/L | [1]       |
| verbascoside                                    | 0.5 ± 0.03                    | mmol/L | [1]       |
| Leucosceptoside                                 | 0.7 ± 0.04                    | mmol/L | [1]       |
| Isoacteoside                                    | 0.1 ± 0.01                    | mmol/L | [1]       |

**Table S2.** Binding affinities and molecular interactions between selected known inhibitors and alpha glucosidase (5nn8).

| Known Inhibitors compounds | Binding Energy kJ/mol | Hydrogen bonding residues and bond length Å                                                                                                                                                | Hydrophobic bonding residues                                                                                                                                                                                                                               |
|----------------------------|-----------------------|--------------------------------------------------------------------------------------------------------------------------------------------------------------------------------------------|------------------------------------------------------------------------------------------------------------------------------------------------------------------------------------------------------------------------------------------------------------|
| Apigenin-7-O-Rutinoside    | -38.1                 | Tyr <sup>360</sup> (3.08)<br>Met <sup>363</sup> (3.04)<br>His <sup>584</sup> (3.11)<br>Arg <sup>594</sup> (3.07)<br>Arg <sup>608</sup> (2.84, 3.09)<br>Ser <sup>864</sup> (2.93)           | Gly <sup>359</sup> , Phe <sup>362</sup> , Tyr <sup>609</sup> , His <sup>717</sup> , Leu <sup>865</sup> , Glu <sup>866</sup><br>Val <sup>867</sup> , Leu <sup>868</sup> , Glu <sup>869</sup>                                                                |
| Plicatanoside              | -37.7                 | Asp <sup>356</sup> (2.85)<br>Arg <sup>608</sup> (2.70, 3.00)<br>Glu <sup>869</sup> (3.22)                                                                                                  | Leu <sup>355</sup> , Gly <sup>359</sup> , Phe <sup>362</sup> , His <sup>584</sup> , Val <sup>718</sup> His <sup>717</sup> ,<br>Leu <sup>860</sup> , Leu <sup>865</sup> , Glu <sup>866</sup> , Val <sup>867</sup> , Leu <sup>868</sup> , Glu <sup>869</sup> |
| Rutin                      | -37.7                 | Trp <sup>360</sup> (2.67)<br>Leu <sup>355</sup> (2.91)<br>Asp <sup>356</sup> (2.85)<br>Met <sup>363</sup> (3.22)<br>Arg <sup>608</sup> (2.89,3.10,3.10)                                    | Pro <sup>361</sup> , Phe <sup>362</sup> , Gly <sup>359</sup> , Val <sup>718</sup> His <sup>717</sup> , Leu <sup>860</sup> ,<br>Leu <sup>865</sup> , Glu <sup>866</sup> Val <sup>867</sup> , Leu <sup>868</sup>                                             |
| Leucosceptoside            | -36.0                 | Asp <sup>365</sup> (2.99)<br>His <sup>584</sup> (3.12)<br>Arg <sup>608</sup> (2.81)<br>His <sup>717</sup> (2.92)<br>Ser <sup>864</sup> (2.92)<br>Val <sup>867</sup> (2.99)                 | Try <sup>360</sup> , Gly <sup>359</sup> , Met <sup>363</sup> , Pro <sup>595</sup> , Glu <sup>866</sup> , Val <sup>867</sup> ,<br>Leu <sup>868</sup> , Glu <sup>869</sup>                                                                                   |
| Vitexin                    | -35.6                 | Tyr <sup>360</sup> (2.70)<br>Met <sup>363</sup> (3.12)<br>Arg <sup>608</sup> (3.26, 3.30)<br>Val <sup>867</sup> (2.80)<br>Leu <sup>868</sup> (3.00)                                        | Pro <sup>361</sup> , Phe <sup>362</sup> , His <sup>584</sup> , Arg <sup>594</sup> , Tyr <sup>609</sup> , His <sup>717</sup> ,<br>Leu <sup>865</sup> , Glu <sup>866</sup> , Glu <sup>869</sup>                                                              |
| Isoacteoside               | -35.1                 | Pro <sup>94</sup> (2.93, 3.27)<br>Asp <sup>95</sup> (2.98)<br>Arg <sup>275</sup> (3.15)<br>Arg <sup>331</sup> (2.79, 2.92)<br>Tyr <sup>543</sup> (3.17)<br>Val <sup>544</sup> (2.92, 3.15) | Asp <sup>91</sup> , Ile <sup>98</sup> , Tyr <sup>110</sup> , Gly <sup>123</sup> , Gln <sup>124</sup> , Pro <sup>125</sup> ,<br>Cys <sup>127</sup> , Val <sup>321</sup>                                                                                     |
| Verbascoside               | -35.1                 | Asp <sup>356</sup> (2.95,3.17)<br>Arg <sup>608</sup> (2.76)<br>His <sup>717</sup> (3.03)<br>Ser <sup>864</sup> (2.80)<br>Val <sup>867</sup> (3.03)                                         | Try <sup>360</sup> , Gly <sup>359</sup> , Met <sup>363</sup> , His <sup>584</sup> , Arg <sup>594</sup> , Pro <sup>595</sup> ,<br>Glu <sup>866</sup> , Val <sup>867</sup> , Leu <sup>868</sup> , Glu <sup>869</sup>                                         |
| Hesperetin_5-O-glucoside   | -34.3                 | Ile <sup>581</sup> (2.86)<br>Arg <sup>608</sup> (3.25)<br>Ser <sup>864</sup> (2.79)<br>Leu <sup>868</sup> (3.04,3.26)<br>Glu <sup>869</sup> (3.20)                                         | Pro <sup>361</sup> , Met <sup>363</sup> , Phe <sup>362</sup> , His <sup>584</sup> , Arg <sup>585</sup> ,<br>Arg <sup>594</sup> , Tyr <sup>609</sup> , His <sup>717</sup> , Leu <sup>865</sup> ,                                                            |
| Swertisin                  | -33.9                 | Arg <sup>594</sup> (3.01)<br>Ser <sup>864</sup> (2.84)<br>Glu <sup>866</sup> (2.97)<br>Leu <sup>868</sup> (3.05, 3.07)<br>Glu <sup>869</sup> (2.97)                                        | Phe <sup>362</sup> , His <sup>584</sup> , Arg <sup>585</sup> , His <sup>717</sup> , Leu <sup>865</sup> , Val <sup>867</sup>                                                                                                                                |

|                            |        |                                                                                                                                                                                                         |                                                                                                                                                                                                                    |
|----------------------------|--------|---------------------------------------------------------------------------------------------------------------------------------------------------------------------------------------------------------|--------------------------------------------------------------------------------------------------------------------------------------------------------------------------------------------------------------------|
| Tiliroside                 | -33.5  | Tyr <sup>360</sup> (2.67)<br>His <sup>584</sup> (2.89)<br>His <sup>717</sup> (2.99)<br>Arg <sup>608</sup> (3.10)<br>Glu <sup>866</sup> (2.72)<br>Leu <sup>868</sup> (2.86)<br>Glu <sup>869</sup> (3.08) | Pro <sup>361</sup> , Phe <sup>362</sup> , Arg <sup>594</sup> , Leu <sup>865</sup> , Val <sup>867</sup>                                                                                                             |
| Isoquercetrin              | -33.1  | Asp <sup>91</sup> (3.17)<br>Glu <sup>124</sup> (2.91)<br>Trp <sup>273</sup> (2.70, 3.00)<br>Arg <sup>331</sup> (2.84, 3.60)<br>Tyr <sup>543</sup> (3.20, 3.21)                                          | Ala <sup>93</sup> , Ile <sup>98</sup> , Tyr <sup>110</sup> , Gly <sup>123</sup> , Gln <sup>124</sup> , Pro <sup>125</sup> ,<br>Trp <sup>126</sup> , Cys <sup>127</sup> , Trp <sup>274</sup> , Val <sup>321</sup> , |
| Fisetin                    | -31.4  | Tyr <sup>360</sup> (2.17, 3.21)<br>His <sup>584</sup> (2.94)<br>Val <sup>867</sup> (3.08)                                                                                                               | Phe <sup>362</sup> , Arg <sup>594</sup> , Arg <sup>608</sup> , His <sup>717</sup> , Ser <sup>864</sup> ,<br>Leu <sup>865</sup> , Glu <sup>866</sup>                                                                |
| Luteolin                   | -31.4  | Asp <sup>282</sup> (3.13)<br>Asp <sup>404</sup> (3.03)<br>Ser <sup>523</sup> (3.09)<br>His <sup>674</sup> (2.92)                                                                                        | Trp <sup>376</sup> , Trp <sup>481</sup> , Trp <sup>516</sup> , Asp <sup>518</sup> , Met <sup>519</sup> ,<br>Phe <sup>525</sup> , Asp <sup>616</sup> , Phe <sup>649</sup>                                           |
| Myricetin                  | -31.4  | Tyr <sup>360</sup> (2.90, 3.07)<br>His <sup>584</sup> (2.89)<br>Arg <sup>608</sup> (2.85)<br>Val <sup>867</sup> (3.16)                                                                                  | Phe <sup>362</sup> , Arg <sup>594</sup> , Pro <sup>595</sup> , His <sup>717</sup> , Leu <sup>865</sup> , Glu <sup>866</sup>                                                                                        |
| Quercetin                  | -31.4  | Tyr <sup>360</sup> (2.88)<br>His <sup>584</sup> (3.06)<br>Arg <sup>608</sup> (2.91)<br>Val <sup>867</sup> (2.88,3.15)                                                                                   | Phe <sup>362</sup> , Arg <sup>594</sup> , Pro <sup>595</sup> , His <sup>717</sup> , Leu <sup>865</sup> , Glu <sup>866</sup>                                                                                        |
| Sulochrin                  | -31.0  | Met <sup>363</sup> (2.86)<br>His <sup>584</sup> (3.30)<br>Val <sup>867</sup> (3.00)                                                                                                                     | Phe <sup>362</sup> , Arg <sup>594</sup> , Arg <sup>608</sup><br>His <sup>717</sup> , Asp <sup>860</sup> , Leu <sup>865</sup> , Glu <sup>866</sup> , Val <sup>867</sup> , Leu <sup>868</sup>                        |
| Acacetin                   | -30.1  | Leu <sup>756</sup> (2.91)                                                                                                                                                                               | Val <sup>740</sup> , His <sup>742</sup> , Thr <sup>739</sup> , Gln <sup>743</sup> , Val <sup>755</sup> , Gln <sup>757</sup> ,<br>Lys <sup>760</sup> , Glu <sup>762</sup> , Thr <sup>764</sup> , Trp <sup>804</sup> |
| Naringenin                 | -30.1  | Leu <sup>756</sup> (2.91)                                                                                                                                                                               | Val <sup>740</sup> , His <sup>742</sup> , Thr <sup>739</sup> , Gln <sup>743</sup> , Val <sup>755</sup> , Gln <sup>757</sup> ,<br>Lys <sup>760</sup> , Glu <sup>762</sup> , Thr <sup>764</sup> , Trp <sup>804</sup> |
| Rosmaric_acid              | -30.1  | His <sup>584</sup> (2.95)<br>Arg <sup>608</sup> (2.95,3.26)<br>Val <sup>867</sup> (2.85)<br>Leu <sup>868</sup> (2.95)<br>Gln <sup>869</sup> (3.24)                                                      | Phe <sup>362</sup> , Met <sup>363</sup> , Arg <sup>594</sup> , Pro <sup>595</sup> , Tyr <sup>609</sup> , His <sup>717</sup> ,<br>Ser <sup>864</sup> , Leu <sup>865</sup> , Glu <sup>866</sup>                      |
| Kaempferol                 | -29.3  | Leu <sup>756</sup> (3.01)                                                                                                                                                                               | Thr <sup>739</sup> , Gln <sup>743</sup> , Val <sup>755</sup> , Gln <sup>757</sup> , Lys <sup>760</sup> , Glu <sup>762</sup> ,<br>Thr <sup>764</sup> , Trp <sup>804</sup>                                           |
| 4'-Amino-4-hydroxychalcone | -28.03 | Asp <sup>518</sup> (2.87)                                                                                                                                                                               | Trp <sup>376</sup> , Asp <sup>404</sup> , Trp <sup>516</sup> , Arg <sup>600</sup> , Asp <sup>616</sup> ,<br>Phe <sup>649</sup> , Leu <sup>677</sup>                                                                |
| Voglibose                  | -24.7  | Met <sup>363</sup> (2.78)<br>His <sup>584</sup> (3.02)<br>Ser <sup>864</sup> (3.04)<br>Val <sup>867</sup> (3.16)<br>Leu <sup>868</sup> (2.87)                                                           | Phe <sup>362</sup> , Arg <sup>594</sup> , Pro <sup>595</sup> , His <sup>717</sup> , Leu <sup>865</sup> , Glu <sup>866</sup> ,                                                                                      |
| Miglitol                   | -23.4  | Met <sup>363</sup> (2.89, 2.96)<br>His <sup>717</sup> (3.01)<br>Ser <sup>864</sup> (2.70)                                                                                                               | Phe <sup>362</sup> , Arg <sup>594</sup> , Pro <sup>595</sup> , Leu <sup>865</sup> , Glu <sup>866</sup>                                                                                                             |

|                                                          |       |                                |                                                                                                                                                                        |
|----------------------------------------------------------|-------|--------------------------------|------------------------------------------------------------------------------------------------------------------------------------------------------------------------|
|                                                          |       | Val <sup>867</sup> (3.17)      |                                                                                                                                                                        |
|                                                          |       | Leu <sup>868</sup> (3.17,3.03) |                                                                                                                                                                        |
| 4-(p-toluensesul<br>fonamide)-3,4-<br>dihydroxy chalcone | -23.4 | Val <sup>236</sup> (3.00)      | Val <sup>84</sup> , Phe <sup>90</sup> , Phe <sup>129</sup> , Pro <sup>130</sup> , Pro <sup>131</sup> , Pro <sup>217</sup> ,<br>Ala <sup>237</sup> , Pro <sup>238</sup> |

**Table S3.** Per – residue decomposition analysis of amino acids of the potential lead compounds.

| Compound                       | H-bond Residue       | Total Energy<br>(kJ/mol) |
|--------------------------------|----------------------|--------------------------|
| Taraxasterol                   | Leu <sup>677</sup>   | -0.0050                  |
|                                | Leu <sup>687</sup>   | -0.0075                  |
| Syriogenin                     | Asp <sup>281</sup>   | 0.3686                   |
|                                | Asp <sup>282</sup>   | -0.4018                  |
|                                | Asp <sup>616</sup>   | -0.3891                  |
|                                | Leu <sup>677</sup>   | -0.0750                  |
| Isorhamnetin-3-O-robinobioside | Asp <sup>282</sup>   | -5.61                    |
|                                | Asp <sup>404</sup>   | 0.63                     |
|                                | Trp <sup>481</sup>   | -24.04                   |
|                                | Asp <sup>518</sup>   | 19.19                    |
|                                | Arg <sup>600</sup>   | 9.63                     |
|                                | Asp <sup>616</sup>   | -4.67                    |
| Calotoxin                      | Asp <sup>282</sup> , | 0.1122                   |
|                                | Asn <sup>524</sup>   | 0.0073                   |
|                                | Phe <sup>525</sup>   | -0.0382                  |
|                                | Asp <sup>616</sup>   | -0.0404                  |
| Acarbose                       | Asp <sup>282</sup>   | 17.0038                  |
|                                | Asp <sup>404</sup>   | 19.5988                  |
|                                | Asn <sup>524</sup>   | 0.2110                   |
|                                | Phe <sup>525</sup>   | -0.3763                  |
|                                | Arg <sup>600</sup>   | -8.3071                  |
|                                | Asp <sup>616</sup>   | 31.1002                  |
|                                | His <sup>674</sup>   | -2.2183                  |

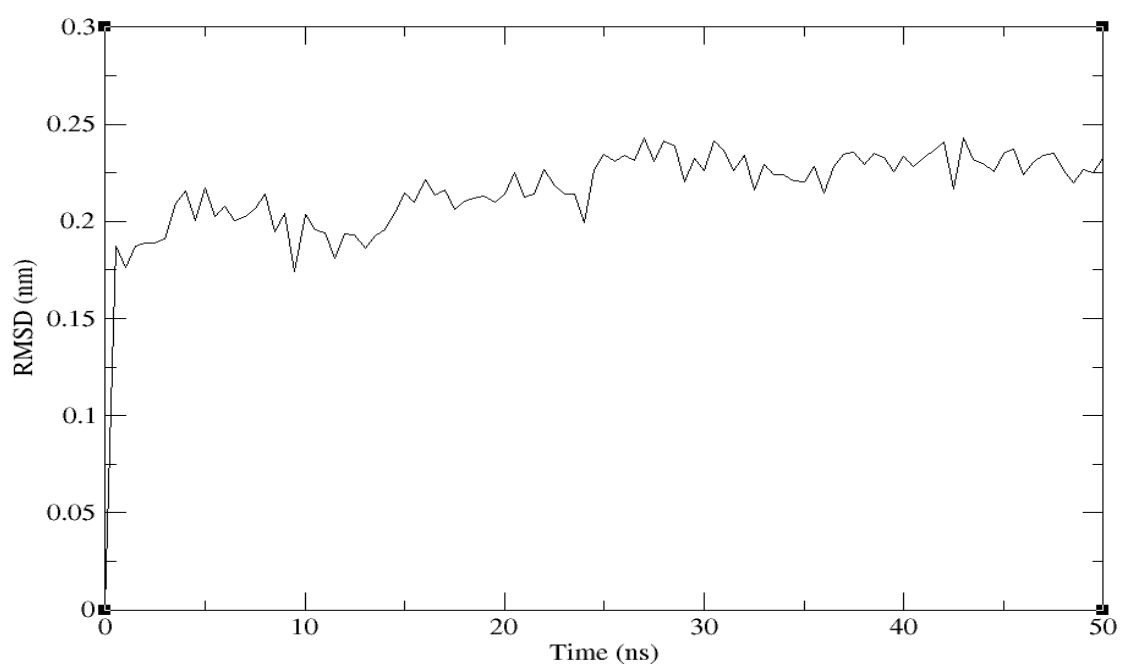

**Figure S1.** RMSD of 5nn8 during molecular dynamics simulations for 50ns.

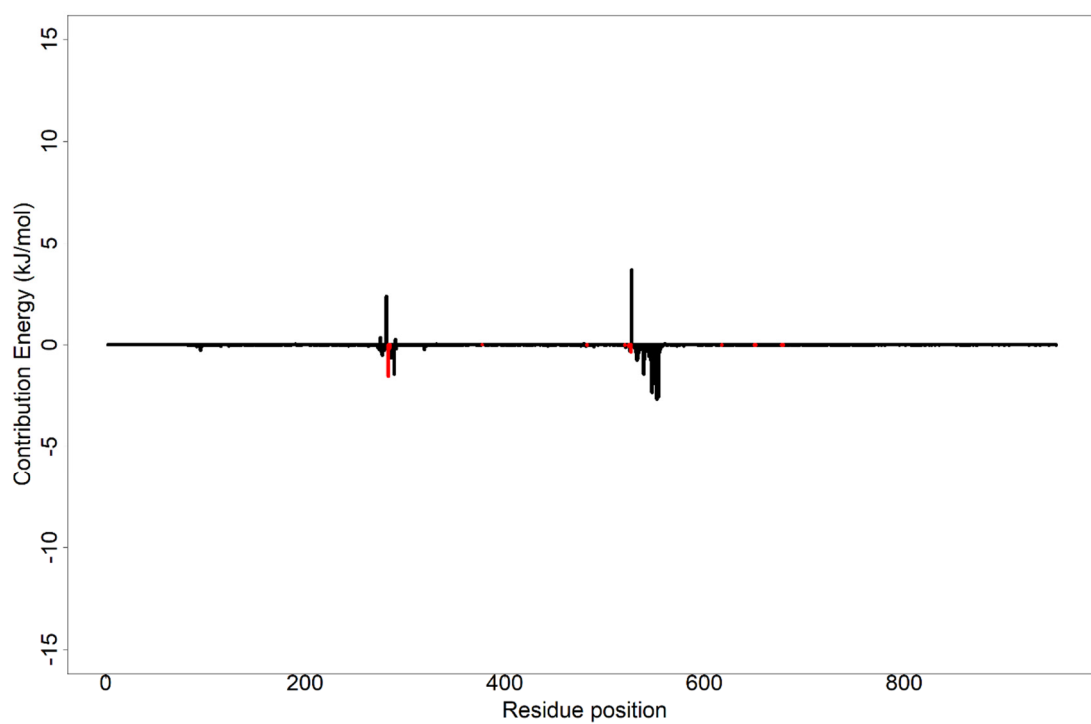

**Figure S2.** MM-PBSA plot of free binding energy contribution per residue decomposition of taraxasterol- $\alpha$ -glucosidase complex.

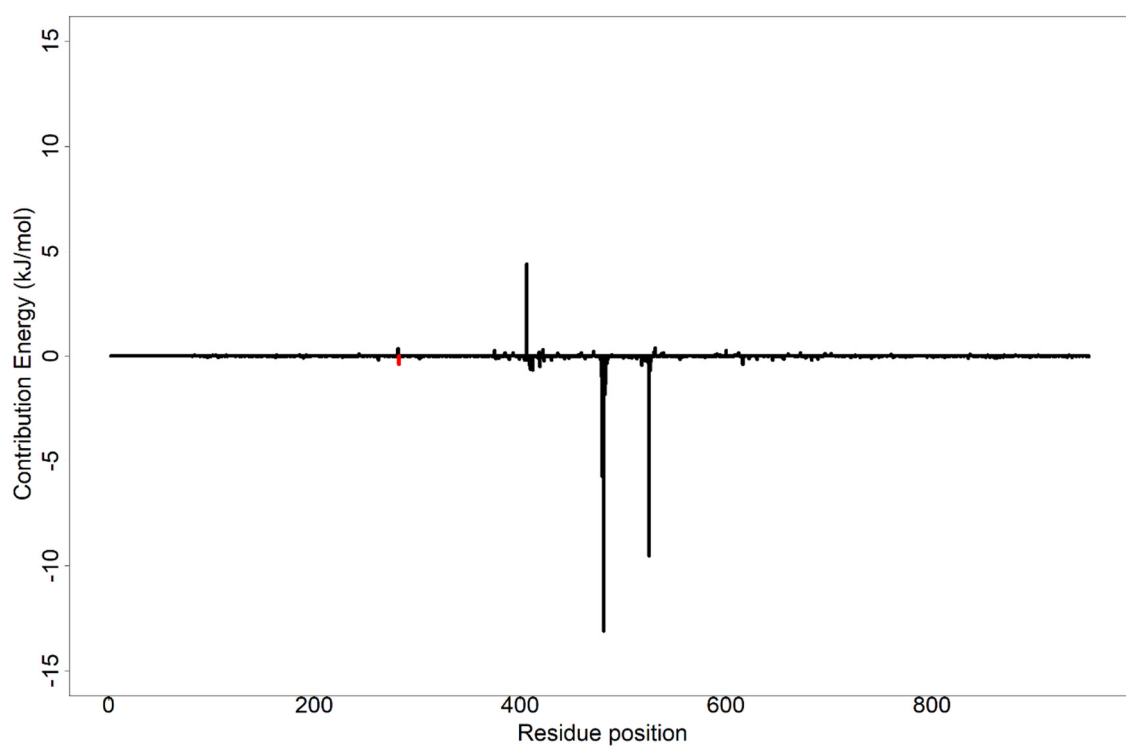

**Figure S3.** MM-PBSA plot of free binding energy contribution per residue decomposition of syriogenin- $\alpha$ -glucosidase complex. *Hydrogen bonding residues labelled in red*

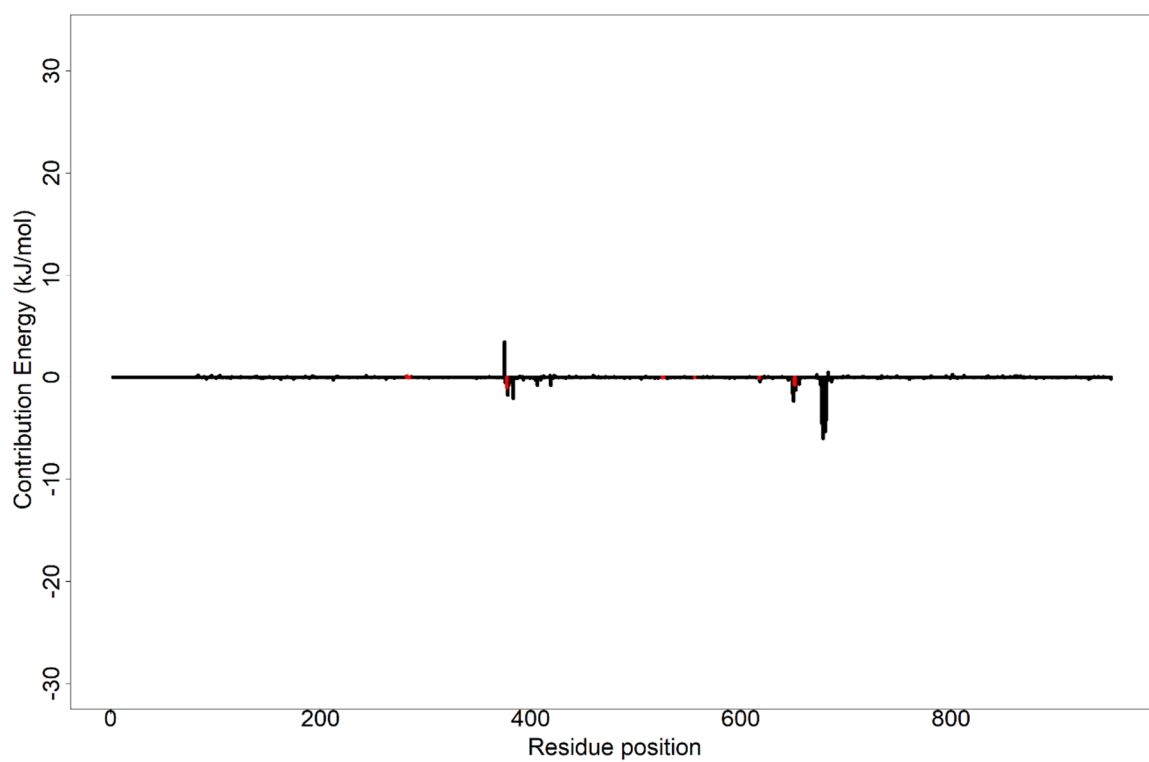

**Figure S4.** MM-PBSA plot of free binding energy contribution per residue of the complex of calotoxin with  $\alpha$ -glucosidase. *Hydrogen bonding residues labelled in red*

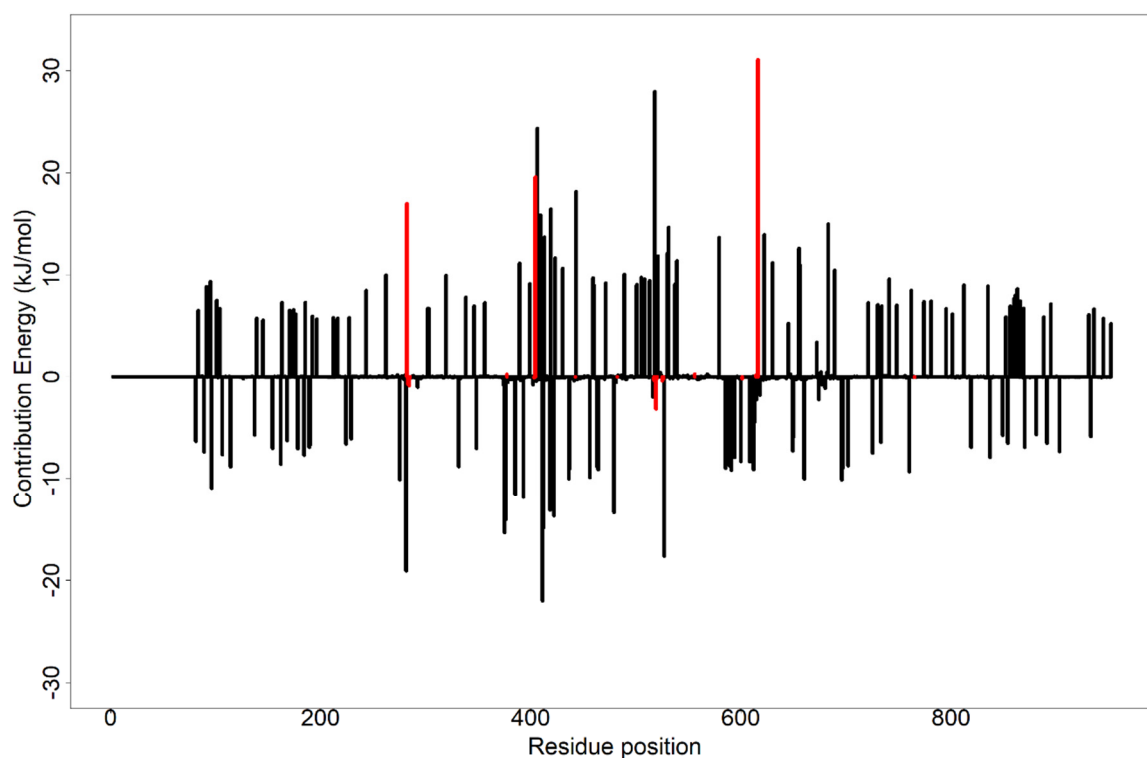

**Figure S5.** MM-PBSA plot of free binding energy contribution per residue of acarbose- $\alpha$  glucosidase complex. Hydrogen bonding residues labelled in red.

## References

1. Yin, Z.; Zhang, W.; Feng, F.; Zhang, Y.; Kang, W.  $\alpha$ -Glucosidase inhibitors isolated from medicinal plants. *Food Sci. Hum. Wellness* **2014**, *3*, 136–174. <https://doi.org/10.1016/j.fshw.2014.11.003>.
2. Dewi, R.T.; Maryani, F. Antioxidant and  $\alpha$ -Glucosidase Inhibitory Compounds of Centella Asiatica. *Procedia Chem.* **2015**, *17*, 147–152. <https://doi.org/10.1016/j.proche.2015.12.130>.
3. Jia, Y.; Ma, Y.; Cheng, G.; Zhang, Y.; Cai, S. Comparative Study of Dietary Flavonoids with Different Structures as  $\alpha$ -Glucosidase Inhibitors and Insulin Sensitizers. *J. Agric. Food Chem.* **2019**, *67*, 10521–10533. <https://doi.org/10.1021/acs.jafc.9b04943>.
4. William, J.; John, P.; Mumtaz, M.W.; Ch, A.R.; Adnan, A.; Mukhtar, H.; Sharif, S.; Raza, S.A.; Akhtar, M.T. Antioxidant activity,  $\alpha$ -glucosidase inhibition and phytochemical profiling of Hyophorbe lagenicaulis leaf extracts. *PeerJ* **2019**, *7*, e7022. <https://doi.org/10.7717/peerj.7022>.
5. Chen, J.; Wu, S.; Zhang, Q.; Yin, Z.; Zhang, L.  $\alpha$ -Glucosidase inhibitory effect of anthocyanins from Cinnamomum camphora fruit: Inhibition kinetics and mechanistic insights through in vitro and in silico studies. *Int. J. Biol. Macromol.* **2019**, *143*, 696–703. <https://doi.org/10.1016/j.ijbiomac.2019.09.091>.
6. Tabussum, A.; Riaz, N.; Saleem, M.; Ashraf, M.; Ahmad, M.; Alam, U.; Jabeen, B.; Malik, A.; Jabbar, A.  $\alpha$ -Glucosidase in-hibitory constituents from Chrozophora plicata. *Phytochem. Lett.* **2013**, *6*, 614–619. <https://doi.org/10.1016/j.phytol.2013.08.005>.
7. Lestari, W.; Dewi, R.T.; Kardono, L.B.S.; Yanuar, A. Docking sulochrin and its derivative as  $\alpha$ -glucosidase inhibitors of *Saccharomyces cerevisiae*. *Indones. J. Chem.* **2017**, *17*, 144–150.
8. Jhong, C.H.; Riyaphan, J.; Lin, S.H.; Chia, Y.C.; Weng, C.F. Screening alpha-glucosidase and alpha-amylase inhibitors from natural compounds by molecular docking in silico. *BioFactors* **2015**, *41*, 242–251. <https://doi.org/10.1002/biof.1219>.
9. Zahoor, M.; Bari, W.U.; Zeb, A.; Khan, I. Toxicological, anticholinesterase, antilipidemic, antidiabetic and antioxidant potentials of Grewia optiva Drummond ex Burret extracts. *J. Basic Clin. Physiol. Pharmacol.* **2019**, *31*, 20190220.
10. Kasturi, S.; Surarapu, S.; Uppalanchi, S.; Anireddy, J.S.; Dwivedi, S.; Anantaraju, H.S.; Perumal, Y.; Sigalapalli, D.K.; Babu, B.N.; Ethiraj, K.S. Synthesis and  $\alpha$ -glucosidase inhibition activity of dihydroxy pyrrolidines. *Bioorganic Med. Chem. Lett.* **2017**, *27*, 2818–2823. <https://doi.org/10.1016/j.bmcl.2017.04.078>.

11. Zhu, J.; Zhang, B.; Tan, C.; Huang, Q.  $\alpha$ -Glucosidase inhibitors: Consistency of: In silico docking data with in vitro inhibitory data and inhibitory effect prediction of quercetin derivatives. *Food Funct.* **2019**, *10*, 6312–6321. <https://doi.org/10.1039/c9fo01333d>.
